# Supplementary material for: Variation in Fungal Community in Grapevine (Vitis vinifera) Nursery Stock Depends on Nursery, Variety and Rootstock
Source: MDPI journal article supplement (doi:10.3390/jof8010047), 2022-01-03
Supplement: s1 [file s1]

## Supplementary Materials

**Table S1.** % GTDs (per OTUs) in graft unions as influenced by variety under nursery conditions in Catalonia, NE Spain. Results are grouped by homogenous group (determined from LS Means) and compared with previous groupings based on severity of grapevine trunk disease (GTD) symptoms related to actual disease presence in varieties under field conditions in La Mancha Designation of Origin (DO), Central Spain.

| Group | Variety            | LS Means | Homogenous group | Field Conditions* | Susceptibility                                                                               |
|-------|--------------------|----------|------------------|-------------------|----------------------------------------------------------------------------------------------|
| 1     | Carignan (tinta)   | 0.894    | A                |                   | High<br> |
| 2     | Malvasia           | 0.672    | AB               | CD                |                                                                                              |
| 3     | Sumoll             | 0.601    | B                |                   |                                                                                              |
| 4     | Autumn Royal       | 0.509    | BC               |                   |                                                                                              |
| 5     | Xarel.lo vermell   | 0.418    | BCD              |                   |                                                                                              |
| 6     | Tempranillo        | 0.356    | BCDE             | CD                |                                                                                              |
|       | Chardonnay         | 0.356    | CD               | D                 |                                                                                              |
|       | Macabeu            | 0.351    | CD               | CD                |                                                                                              |
| 7     | Garnacha tinta     | 0.343    | CD               | D                 |                                                                                              |
|       | Xarel.lo           | 0.318    | CD               |                   |                                                                                              |
| 8     | Merlot             | 0.323    | CDE              | D                 | Low                                                                                          |
|       | Parellada          | 0.283    | DE               | D                 |                                                                                              |
|       | Syrah              | 0.265    | DE               | BCD               |                                                                                              |
| 9     | Pinot Noir         | 0.233    | DE               | D                 |                                                                                              |
|       | Caladoc            | 0.202    | DE               |                   |                                                                                              |
| 10    | Cabernet Sauvignon | 0.209    | E                | BCD               |                                                                                              |

\* Reference Field Conditions data from Chacón-Vozmediano et al., 2021 [47].

**Table S2.** List of GTD-related fungi. All species that appeared in this study and that have been considered as GTD-related fungus, or that are of the same genus. Method of identification was either via isolation and sequencing the amplified region ITS 1-4 (Iso), or by metabarcoding and sequencing (MBC). All fungi belong to the Phylum *Ascomycota*.

| GTD Species                        | Method  | Family                    | # OTUs | Tissue     | Life mode | Disease caused                  | References                |
|------------------------------------|---------|---------------------------|--------|------------|-----------|---------------------------------|---------------------------|
| <i>Acremonium alternatum</i>       | MBC     | <i>Bionectriaceae</i>     | 5      | Both       | E         |                                 | 47, 48                    |
| <i>Acremonium hansfordii</i>       | MBC     | <i>Bionectriaceae</i>     | 1      | Root       |           |                                 | 49                        |
| <i>Acremonium sp.</i>              | MBC     | <i>Bionectriaceae</i>     | 12     | Both       | P,E       | 'Hoja de malvon'                | 33, 50-55, 147            |
| <i>Botryosphaeria dothidea</i>     | MBC     | <i>Botryosphaeriaceae</i> | 2      | Both       | P,E,S     | dieback, Macrophoma rot         | 17,18, 33, 51, 52, 56-72  |
| <i>Botryosphaeria sp.</i>          | MBC/Iso | <i>Botryosphaeriaceae</i> | 2      | Both/Graft | P,E       | dieback, Macrophoma rot         | 51, 61, 73-76             |
| <i>Cadophora luteo-olivacea</i>    | MBC     | <i>Ploettnerulaceae</i>   | 7      | Both       | P         | Petri disease                   | 2, 65, 72, 77, 78         |
| <i>Cadophora malorum</i>           | MBC     | <i>Ploettnerulaceae</i>   | 1      | Both       |           | Soft rot                        | 79, 80                    |
| <i>Campylocarpon fasciculare</i>   | MBC     | <i>Nectriaceae</i>        | 2      | Both       | P         | Wood canker, Black foot disease | 2, 51, 81-86              |
| <i>Campylocarpon sp.</i>           | MBC     | <i>Nectriaceae</i>        | 1      | Both       |           |                                 | 87-89                     |
| <i>Cylindrocarpon sp.</i>          | MBC     | <i>Nectriaceae</i>        | 7      | Both       | P,S       | Black foot                      | 33, 51,74, 75, 77, 90, 91 |
| <i>Dactylonectria alcacerensis</i> | Iso     | <i>Nectriaceae</i>        |        | Root       | P         | Black foot                      | 86, 92                    |
| <i>Dactylonectria anthuriicola</i> | Iso     | <i>Nectriaceae</i>        |        | Root       |           |                                 | 88                        |
| <i>Dactylonectria sp.</i>          | Iso     | <i>Nectriaceae</i>        |        | Both       | P         | Black foot                      | 88, 89                    |
| <i>Diaporthe celeris</i>           | Iso     | <i>Diaporthaceae</i>      |        | Graft      | P         | Canker and Arm swelling         | 93                        |

|                                    |         |                           |   |            |       |                                                        |                                      |
|------------------------------------|---------|---------------------------|---|------------|-------|--------------------------------------------------------|--------------------------------------|
| <i>Diaporthe foeniculina</i>       | MBC     | <i>Diaporthaceae</i>      | 1 | Both       | P     | Canker and Arm swelling                                | 18, 94-97                            |
| <i>Diaporthe hispaniae</i>         | Iso     | <i>Diaporthaceae</i>      |   | Graft      |       |                                                        | 93                                   |
| <i>Diaporthe rudis</i>             | MBC     | <i>Diaporthaceae</i>      | 1 | Both       | P,S   | Canker                                                 | 33, 64, 95, 96, 98-100               |
| <i>Diaporthe sp.</i>               | MBC/Iso | <i>Diaporthaceae</i>      | 1 | Both/Both  | P     | Canker                                                 | 18, 77, 94, 101-105                  |
| <i>Diplodia sp.</i>                | MBC/Iso | <i>Botryosphaeriaceae</i> | 4 | Both/Both  | P     | Canker                                                 | 77, 104, 106, 107                    |
| <i>Eucasphaeria capensis</i>       | MBC     | <i>Niessliaceae</i>       | 1 | Both       | P     | Eutypa dieback                                         | 72                                   |
| <i>Ilyonectria liriodendri</i>     | Iso     | <i>Nectriaceae</i>        |   | Root       | P     | Black foot                                             | 51, 82, 85, 92, 108, 109             |
| <i>Ilyonectria sp.</i>             | Iso     | <i>Nectriaceae</i>        |   | Both       | P,S   | Black foot                                             | 33, 85, 108, 110                     |
| <i>Lasiopodia sp.</i>              | MBC     |                           |   |            |       | Botryosphaeria die back                                | 111                                  |
| <i>Nectria sp.</i>                 | MBC     | <i>Nectriaceae</i>        | 4 | Both       | S     |                                                        | 112, 113                             |
| <i>Neofusicoccum parvum</i>        | MBC/Iso | <i>Botryosphaeriaceae</i> | 2 | Both/Graft | P,E,S | Botryosphaeria die back                                | 33, 52, 54, 60, 65, 83, 114-121, 147 |
| <i>Neofusicoccum sp.</i>           | MBC/Iso | <i>Botryosphaeriaceae</i> | 2 | Both/Both  |       |                                                        | 107                                  |
| <i>Paraphoma sp.</i>               | MBC     | <i>Phaeosphaeriaceae</i>  | 1 | Both       |       |                                                        |                                      |
| <i>Pestalotiopsis sp.</i>          | MBC/Iso | <i>Sporocadaceae</i>      | 2 | Both/Graft | P,E,S | Fruit rot                                              | 33, 51, 64, 122                      |
| <i>Phaeoacremonium minimum</i>     | MBC     | <i>Togniniaceae</i>       | 3 | Both       | P     | Esca                                                   | 64, 85, 108, 123, 124                |
| <i>Phaeoacremonium parasiticum</i> | MBC     | <i>Togniniaceae</i>       | 1 | Both       | P     | Esca                                                   | 50, 125, 126                         |
| <i>Phaeoacremonium sp.</i>         | MBC     | <i>Togniniaceae</i>       | 7 | Both       | P,S   | Esca                                                   | 33, 50, 53, 127, 128                 |
| <i>Phaeomoniella chlamydospora</i> | MBC     | <i>Phaeomoniellaceae</i>  | 3 | Both       | P,E   | Esca                                                   | 129-136                              |
| <i>Phaeomoniella sp.</i>           | MBC     | <i>Phaeomoniellaceae</i>  | 2 | Both       |       | Esca                                                   | 128                                  |
| <i>Phoma sp.</i>                   | MBC     | <i>Didymellaceae</i>      | 8 | Both       | P,E,S | Leaf and stem lesions                                  | 33, 54, 57, 77, 147                  |
| <i>Phomopsis ampelina</i>          | MBC     | <i>Diaporthaceae</i>      | 1 | Both       | P, S  | Phomopsis cane and leaf spot/Deadarm/Phomopsis dieback | 18, 57                               |
| <i>Phomopsis sp.</i>               | MBC     | <i>Diaporthaceae</i>      | 5 | Both       | P,E,S | Phomopsis cane and leaf spot/Deadarm/Phomopsis dieback | 57                                   |
| <i>Pleurostoma richardsiae</i>     | MBC     | <i>Pleurostomataceae</i>  | 1 | Graft      | P     | Trunk disease                                          | 10, 71, 128                          |
| <i>Thelonectria sp.</i>            | Iso     | <i>Nectriaceae</i>        |   | Root       | P     | Black foot disease                                     | 65                                   |
| <i>Truncatella angustata</i>       | MBC/Iso | <i>Sporocadaceae</i>      | 1 | Root/Both  | P,E   |                                                        | 77, 128, 137, 138, 147, 150          |
| <i>Truncatella sp.</i>             | MBC     | <i>Sporocadaceae</i>      | 1 | Both       |       |                                                        | 150                                  |

**Table S3.** Relative abundance (%) of GTD-related OTUs (species) in each tissue type. Abundances are calculated considering the totals for each tissue separately.

| OTU                                | Graft union  | Root collar |
|------------------------------------|--------------|-------------|
| <i>Acremonium alternatum</i>       | 11.52%       | 0.33%       |
| <i>Botryosphaeria dothidea</i>     | 0.55%        | 0.11%       |
| <i>Cadophora luteo-olivacea</i>    | 30.44%       | 4.61%       |
| <i>Campylocarpon fasciculare</i>   | -            | 0.15%       |
| <i>Cylindrocarpon sp.</i>          | 0.01%        | 0.13%       |
| <i>Diplodia sp.</i>                | 0.55%        | 0.11%       |
| <i>Neofusicoccum parvum</i>        | 1.25%        | 0.04%       |
| <i>Phaeoacremonium minimum</i>     | 1.28%        | 0.44%       |
| <i>Phaeomoniella chlamydospora</i> | 2.09%        | 1.21%       |
| <i>Phomopsis ampelina</i>          | 0.69%        | 0.02%       |
| <i>Phomopsis sp.</i>               | 0.21%        | 0.01%       |
| <b>Total</b>                       | <b>48.6%</b> | <b>7.2%</b> |

**Table S4.** Relative abundance (%) of GTD-related isolates (species) in each tissue type. Abundances are calculated considering the totals for each tissue separately.

| Isolate                            | Graft         |               |
|------------------------------------|---------------|---------------|
|                                    | union         | Root collar   |
| <i>Botryosphaeria</i> sp.          | 3.39%         | -             |
| <i>Dactylonectria alcacerensis</i> | -             | 4.18%         |
| <i>Dactylonectria anthuriicola</i> | -             | 0.52%         |
| <i>Dactylonectria</i> sp.          | 0.26%         | 2.35%         |
| <i>Diaporthe celeris</i>           | 0.78%         | -             |
| <i>Diaporthe hispaniae</i>         | 1.31%         | -             |
| <i>Diaporthe</i> sp.               | 1.04%         | 0.52%         |
| <i>Diplodia</i> sp.                | 3.13%         | 0.78%         |
| <i>Ilyonectria liriodendra</i>     | -             | 0.78%         |
| <i>Ilyonectria</i> sp.             | 0.26%         | 5.22%         |
| <i>Neofusicoccum parvum</i>        | 1.31%         | -             |
| <i>Neofusicoccum</i> sp.           | 6.01%         | 1.31%         |
| <i>Pestalotiopsis</i> sp.          | 0.26%         | -             |
| <i>Thelonectria</i> sp.            | -             | 2.09%         |
| <i>Truncatella angustata</i>       | 0.52%         | 0.52%         |
| <b>Total</b>                       | <b>18.28%</b> | <b>18.28%</b> |

**Table S5.** Indicator species in (A) graft unions and (B) root collars. Graft unions were analyzed by variety and root crowns by rootstock. For each species (OTU), we indicate the community habitat that had the highest correlation with the species. Correlation values (stat) and the statistical significance of the correlation (p-values) are reported. GTD-related indicator species are marked in bold, biocontrol species are marked with an asterisk. Annotation next to the numbers indicates significance level: \*\*\* < 0.001, \*\* < 0.01, \* < 0.05, n.s. = not significant (> 0.05).

#### A. Graft unions

| OTU                                       | Community habitat | stat  | p-value    |
|-------------------------------------------|-------------------|-------|------------|
| <i>Coniochaeta</i> sp.                    | Autumn Royal      | 0.528 | 0.0214 *   |
| <i>Robillarda sessilis</i>                | Caladoc           | 0.408 | 0.0486 *   |
| <i>unknown_42</i>                         | Caladoc           | 0.833 | 0.0007 *** |
| <i>Coprinellus</i> sp.                    | Carignan          | 0.446 | 0.0262 *   |
| <b><i>Diplodia</i> sp.</b>                | Carignan          | 0.698 | 0.0032 **  |
| <b><i>Lasiodiplodia</i> sp.</b>           | Carignan          | 0.572 | 0.0084 **  |
| <b><i>Phaeoacremonium</i> sp.</b>         | Carignan          | 0.502 | 0.0333 *   |
| <b><i>Phaeomoniella chlamydospora</i></b> | Carignan          | 0.729 | 0.0013 **  |
| <i>Thelebolus ellipsoideus</i>            | Carignan          | 0.444 | 0.0196 *   |
| <i>unknown_1218</i>                       | Carignan          | 0.447 | 0.0226 *   |
| <i>unknown_Ascomycota_94</i>              | Carignan          | 0.447 | 0.0125 *   |
| <i>unknown_382</i>                        | Carignan          | 0.427 | 0.0427 *   |
| <i>Erysiphe</i> sp.                       | Malvasia          | 0.546 | 0.0123 *   |

|                                  |                  |       |           |
|----------------------------------|------------------|-------|-----------|
| <i>Neofusicoccum sp._391</i>     | Malvasia         | 0.549 | 0.014 *   |
| <i>Neofusicoccum sp._398</i>     | Malvasia         | 0.458 | 0.0443 *  |
| <i>unknown_604</i>               | Malvasia         | 0.577 | 0.008 **  |
| <i>unknown_Basidiomycota_281</i> | Malvasia         | 0.569 | 0.0086 ** |
| <i>unknown_1250</i>              | Malvasia         | 0.566 | 0.0048 ** |
| <i>unknown_1230</i>              | Malvasia         | 0.456 | 0.0336 *  |
| <i>Septoria sp.</i>              | Pinot Noir       | 0.55  | 0.014 *   |
| <i>unknown_Ascomycota_141</i>    | Pinot Noir       | 0.469 | 0.0282 *  |
| <i>Acremonium alternatum</i>     | Sumoll           | 0.396 | 0.0091 ** |
| <i>Pyrenophora dictyoides</i>    | Sumoll           | 0.406 | 0.0391 *  |
| <i>unknown_554</i>               | Sumoll           | 0.528 | 0.0274 *  |
| <i>unknown_683</i>               | Sumoll           | 0.485 | 0.0337 *  |
| <i>unknown_1582</i>              | Sumoll           | 0.479 | 0.0228 *  |
| <i>Cadophora malorum</i>         | Tempranillo      | 0.499 | 0.0234 *  |
| <i>Leptosphaeria sp.</i>         | Tempranillo      | 0.544 | 0.0106 *  |
| <i>unknown_Ascomycota_12</i>     | Tempranillo      | 0.595 | 0.019 *   |
| <i>unknown_Ascomycota_303</i>    | Tempranillo      | 0.53  | 0.013 *   |
| <i>unknown_1559</i>              | Tempranillo      | 0.459 | 0.033 *   |
| <i>Mortierella hyalina</i>       | Xarel.lo vermell | 0.544 | 0.0143 *  |

## B. Root collars

| OTU                                 | Community habitat | stat  | p-value   |
|-------------------------------------|-------------------|-------|-----------|
| <i>Fusarium sp.</i>                 | R-110             | 0.628 | 0.0112 *  |
| <i>Acremonium sp._1286</i>          | 41B               | 0.272 | 0.0218 *  |
| <i>Acremonium sp._812</i>           | 41B               | 0.199 | 0.0493 *  |
| <i>Cercophora sp.</i>               | 41B               | 0.201 | 0.0233 *  |
| <i>Circinotrichum maculiforme</i>   | 41B               | 0.529 | 0.0143 *  |
| <i>Coprinellus radians</i>          | 41B               | 0.204 | 0.0497 *  |
| <i>Cryptococcus sp.</i>             | 41B               | 0.271 | 0.0031 ** |
| <i>Exidia sp.</i>                   | 41B               | 0.277 | 0.0225 *  |
| <i>Harposporium sp.</i>             | 41B               | 0.293 | 0.01 **   |
| <i>Lasiodiplodia sp.</i>            | 41B               | 0.199 | 0.0274 *  |
| <i>Leptosphaeria sp.</i>            | 41B               | 0.203 | 0.0317 *  |
| <i>Lophiostoma sp._839 *</i>        | 41B               | 0.391 | 0.0046 ** |
| <i>Lophiostoma sp._1100 *</i>       | 41B               | 0.231 | 0.0497 *  |
| <i>Lophiostoma sp._390 *</i>        | 41B               | 0.191 | 0.0396 *  |
| <i>Massarina sp.</i>                | 41B               | 0.286 | 0.0078 ** |
| <i>Mortierella hyalina</i>          | 41B               | 0.281 | 0.0048 ** |
| <i>Radulidium subulatum</i>         | 41B               | 0.19  | 0.0297 *  |
| <i>Seimatosporium sp.</i>           | 41B               | 0.204 | 0.0276 *  |
| <i>Talaromyces amestolkiae</i>      | 41B               | 0.241 | 0.0221 *  |
| <i>Tilletiopsis washingtonensis</i> | 41B               | 0.266 | 0.0206 *  |
| <i>Truncatella sp.</i>              | 41B               | 0.254 | 0.0158 *  |

|                                  |        |       |           |
|----------------------------------|--------|-------|-----------|
| <i>unknown_Ascomycota_99</i>     | 41B    | 0.378 | 0.017 *   |
| <i>unknown_Basidiomycota_219</i> | 41B    | 0.368 | 0.0202 *  |
| <i>unknown_1174</i>              | 41B    | 0.319 | 0.0032 ** |
| <i>unknown_Ascomycota_925</i>    | 41B    | 0.283 | 0.0131 *  |
| <i>unknown_360</i>               | 41B    | 0.275 | 0.0069 ** |
| <i>unknown_Ascomycota_581</i>    | 41B    | 0.262 | 0.0465 *  |
| <i>unknown_666</i>               | 41B    | 0.253 | 0.0208 *  |
| <i>unknown_Ascomycota_189</i>    | 41B    | 0.204 | 0.0451 *  |
| <i>Meira nashicola</i>           | RU-140 | 0.225 | 0.0359 *  |
| <i>Thanatephorus cucumeris</i>   | RU-140 | 0.386 | 0.0286 *  |
| <i>unknown_21</i>                | RU-140 | 0.517 | 0.0465 *  |
| <i>Alternaria sp. *</i>          | SO4    | 0.303 | 0.0268 *  |
| <i>Colletotrichum sp.</i>        | SO4    | 0.299 | 0.0484 *  |
| <i>Oidiodendron cereale</i>      | SO4    | 0.258 | 0.0232 *  |
| <i>Podospora sp.</i>             | SO4    | 0.264 | 0.0426 *  |
| <i>Sarocladium kiliense</i>      | SO4    | 0.355 | 0.0472 *  |
| <i>unknown_Ascomycota_48</i>     | SO4    | 0.318 | 0.0464 *  |
| <i>unknown_771</i>               | SO4    | 0.266 | 0.0333 *  |
| <i>unknown_Basidiomycota_188</i> | SO4    | 0.248 | 0.0473 *  |
